# Supplementary material
Source: publisher site journal article supplement (https://www.dovepress.com/get_supplementary_file.php?f=230955.docx)
Supplement: Supplementary file 1 [file get_supplementary_file.php]

**SUPPLEMENTARY MATERIAL**

**Supplementary Table 1**. The electronic searches across Embase®, MEDLINE®, Cochrane, and MEDLINE® In-Process for indirect evidence

| No. | Embase® and MEDLINE® searches |
| --- | --- |
| #1 | 'chronic obstructive lung disease':ab,ti |
| #2 | 'copd':ab,ti |
| #3 | 'chronic bronchitis':ab,ti |
| #4 | 'emphysema':ab,ti |
| #5 | (chronic* NEAR/3 bronchiti*):ab,ti |
| #6 | (obstruct* NEAR/3 (pulmonary OR lung* OR airway* OR airflow* OR bronch* OR respirat*)):ab,ti |
| #7 | #1 OR #2 OR #3 OR #4 OR #5 OR #6 |
| #8 | (#1 OR #2 OR #3 OR #4 OR #5 OR #6) AND ([cochrane review]/lim OR [systematic review]/lim OR [meta analysis]/lim) |
| #9 | 'meta-analysis'/exp |
| #10 | 'meta-analy*' OR 'metanaly*' OR 'metaanaly*' OR 'met analy*' OR (('integrative research' OR 'integrative review*' OR 'integrative overview*' OR 'research integration' OR 'research overview*' OR 'collaborative review*') AND 'analys*') |
| #11 | ('systematic review*' OR 'systematic overview*' OR 'evidence-based review*' OR 'evidence-based overview*' OR ('evidence' NEAR/3 ('review*' OR 'overview*')) OR 'meta-review*' OR 'meta-overview*' OR 'meta-synthes*' OR 'review of reviews') AND 'analys*' |
| #12 | 'evidence report' AND 'analys*' |
| #13 | 'network' NEAR/2 ('ma' OR 'mas') |
| #14 | 'nma' OR 'nmas' |
| #15 | 'indirect comparison*' |
| #16 | 'indirect treatment*' NEAR/1 'comparison*' |
| #17 | 'mixed treatment*' NEAR/1 'comparison*' |
| #18 | 'multiple treatment*' NEAR/1 'comparison*' |
| #19 | 'multi-treatment*' NEAR/1 'comparison*' |
| #20 | 'simultaneous comparison*' |
| #21 | 'mixed comparison*' |
| #22 | #9 OR #10 OR #11 OR #12 OR #13 OR #14 OR #15 OR #16 OR #17 OR #18 OR #19 OR #20 OR #21 |
| #23 | #7 AND #22 |
| #24 | #8 OR #23 |
| #25 | #24 AND [animals]/lim NOT ([humans]/lim AND [animals]/lim) |
| #26 | #24 NOT #25 |
| #27 | #24 NOT #25 AND ([conference abstract]/lim OR [conference paper]/lim OR [conference review]/lim) |
| #28 | #26 NOT #27 AND [english]/lim AND [2019-2020]/py |

| No. | Cochrane searches |
| --- | --- |
| #1 | 'chronic obstructive lung disease':ab,ti |
| #2 | 'copd':ab,ti |
| #3 | 'chronic bronchitis':ab,ti |
| #4 | 'emphysema':ab,ti |
| #5 | (chronic* NEAR/3 bronchiti*):ab,ti |
| #6 | (obstruct* NEAR/3 (pulmonary OR lung* OR airway* OR airflow* OR bronch* OR respirat*)):ab,ti |
| #7 | #1 OR #2 OR #3 OR #4 OR #5 OR #6 |
| #8 | MeSH descriptor: [Meta-Analysis as Topic] explode all trees |
| #9 | 'meta-analy*' OR 'metanaly*' OR 'metaanaly*' OR 'met analy*' OR (('integrative research' OR 'integrative review*' OR 'integrative overview*' OR 'research integration' OR 'research overview*' OR 'collaborative review*') AND 'analys*') |
| #10 | ('systematic review*' OR 'systematic overview*' OR 'evidence-based review*' OR 'evidence-based overview*' OR ('evidence' NEAR/3 ('review*' OR 'overview*')) OR 'meta-review*' OR 'meta-overview*' OR 'meta-synthes*' OR 'review of reviews') AND 'analys*' |
| #11 | 'evidence report' AND 'analys*' |
| #12 | 'network' NEAR/2 ('ma' OR 'mas') |
| #13 | 'nma' OR 'nmas' |
| #14 | MeSH descriptor: [Network meta-analysis] explode all trees |
| #15 | 'indirect comparison*' |
| #16 | 'indirect treatment*' NEAR/1 'comparison*' |
| #17 | 'mixed treatment*' NEAR/1 'comparison*' |
| #18 | 'multiple treatment*' NEAR/1 'comparison*' |
| #19 | 'multi-treatment*' NEAR/1 'comparison*' |
| #20 | 'simultaneous comparison*' |
| #21 | 'mixed comparison*' |
| #22 | #8 OR #9 OR #10 OR #11 OR #12 OR #13 OR #14 OR #15 OR #16 OR #17 OR #18 OR #19 OR #20 OR #21 |
| #23 | #7 AND #22 |
| #24 | #23 NOT (embase):an |
| #25 | #24 [Limit: clinical answers, protocols, reviews, trials] with Cochrane Library publication date from Jan 2019 to Jan 2020 |

| No. | MEDLINE® In-Process searches |
| --- | --- |
| #6 | Search "chronic obstructive lung disease"[Title/Abstract] |
| #7 | Search "copd"[Title/Abstract] |
| #8 | Search "chronic bronchitis"[Title/Abstract] |
| #9 | Search "emphysema"[Title/Abstract] |
| #10 | Search ((chronic*[Title/Abstract] AND bronchiti*[Title/Abstract])) |
| #11 | Search ((obstruct*[Title/Abstract] AND (pulmonary[Title/Abstract] OR lung*[Title/Abstract] OR airway*[Title/Abstract] OR airflow*[Title/Abstract] OR bronch*[Title/Abstract] OR respirat*)[Title/Abstract])) |
| #12 | Search (#6 OR #7 OR #8 OR #9 OR #10 OR #11) |
| #13 | Search meta-analysis[MeSH Terms] |
| #14 | Search ((("meta-analy*" OR "metanaly*" OR "metaanaly*" OR "met analy*" OR (("integrative research" OR "integrative review*" OR "integrative overview*" OR "research integration" OR "research overview*" OR "collaborative review*") AND "analys*")))) |
| #15 | Search ((evidence AND ("review*" OR "overview*"))) |
| #16 | Search ((("systematic review*" OR "systematic overview*" OR "evidence-based review*" OR "evidence-based overview*" OR "meta-review*" OR "meta-overview*" OR "meta-synthes*" OR "review of reviews") AND "analys*")) |
| #17 | Search (("evidence report" AND "analys*")) |
| #18 | Search (("network" AND ("ma" OR "mas"))) |
| #19 | Search (("nma" OR "nmas")) |
| #20 | Search "indirect comparison*" |
| #21 | Search (("indirect treatment*" AND "comparison*")) |
| #22 | Search (("mixed treatment*" AND "comparison*")) |
| #23 | Search (("multiple treatment*" AND "comparison*")) |
| #24 | Search (("multi-treatment*" AND "comparison*")) |
| #25 | Search "simultaneous comparison*" |
| #26 | Search "mixed comparison*" |
| #27 | Search (#13 OR #14 OR #15 OR #16 OR #17 OR #18 OR #19 OR #20 OR #21 OR #22 OR #23 OR #24 OR #25 OR #26) |
| #28 | Search (#12 AND #27) |
| #29 | Search ((inprocess[sb] OR pubstatusaheadofprint)) |
| #30 | Search (#28 AND #29) |

**Supplementary Table 2** Secondary and other lung function endpoints in head-to-head RCTs

| **Outcomes** | **AERISTO study1** | **Study A23492** | **Study A23502** | **Study GSK2049903** |
| --- | --- | --- | --- | --- |
| **Trough FEV1**  Mean (SE) change from baseline, mL  *Treatment difference, mL* *[CI]* | See primary endpoint table  (Table 2) | GLY/IND: 189.1 (10.7)  UMEC/VIL: 204.3 (10.7)  *–15.3*  *[95% CI = –36.1*, *5.6]*  Superiority was not tested as the primary endpoint was not met.  Treatment difference [CI] suggests comparable treatment effect | GLY/IND: 167.6 (11.1)  UMEC/VIL: 176.7 (11.1)  *–9.1*  *[95% CI = –31.3*, *–13.1]*  Superiority was not tested as the primary endpoint was not met.  Treatment difference [CI] suggests comparable treatment effect | See primary endpoint table  (Table 2) |
| **Trough FEV1 responders**  (≥100 mL improvement)  *OR [CI]* | Assessed 5 min post-dosing on Day 1:  GLY/FOR: 60.1%  TIO/OLO: 40.8%  *2.30 (95% CI=1.79–2.95)*  Nominal superiority of GLY/FOR was not demonstrated | NA | NA | Assessed at Week 8: UMEC/VIL: 66%  TIO/OLO: 48%  *2.05 (95% CI = 1.34*, *3.14)*  Statistically significantly favored UMEC/VIL |
| **FEV1 AUC0–12**  Mean (SE) change from baseline, mL  *Treatment difference, mL* *[CI]* | NA | GLY/IND: 254.3 (10.3)  UMEC/VIL: 284.8 (10.3)  *–30.5*  *[95% CI = –49.2*, –*11.8]*  Superiority was not tested as the primary endpoint was not met.  Treatment difference [CI] suggests a greater treatment effect of UMEC/VIL | GLY/IND: 207.7 (10.8)  UMEC/VIL: 249.6 (10.8)  *–41.9*  *[95% CI = –61.1*, *–22.7]*  Superiority was not tested as the primary endpoint was not met.  Treatment difference [CI] suggests a greater treatment effect of UMEC/VIL | NA |
| **FEV1 AUC12–24**  Mean (SE) change from baseline, mL  *Treatment difference, mL* *[CI]* | NA | GLY/IND: 207.6 (11.6)  UMEC/VIL: 202.5 (11.6)  *5.1*  *[95% CI = –10.8*, *20.9]*  Superiority was not tested as the primary endpoint was not met.  Treatment difference [CI] suggests comparable treatment effect | GLY/IND: 162.5 (12.2)  UMEC/VIL: 153.9 (12.1)  8.6 [95% CI = –8.6, 25.8]  Superiority was not tested as the primary endpoint was not met.  Treatment difference [CI] suggests comparable treatment effect | NA |
| **Trough FVC**  Mean (SE) change from baseline, mL  *Treatment difference, mL* *[CI]* | GLY/FOR: 96.7 (18.4)  UMEC/VIL: 211.2 (18.5)  –114.5  [95% CI = –157.1, –71.9]  Greater treatment effect demonstrated by UMEC/VIL over 24 weeksa | NA | NA | UMEC/VIL: 202 (18)  TIO/OLO: 135 (18)  *67*  *[95% CI = 34*, *100]*  Statistical significance favored UMEC/VIL |
| **IC**  Peak change from baseline within 2 hours post-dosing, mL (SE)  *Treatment difference, mL* *[CI]* | PP:  GLY/FOR: 363.1 (15.5)  UMEC/VIL: 378.3 (15.6)  –15.2  [95% CI = –53.4, 22.9]  NI of GLY/FOR not demonstrated (NI margin –50 mL)  FAS:  GLY/FOR: 372.0 (14.9)  UMEC/VIL: 384.7 (14.9)  –12.7  [95% CI = –49.8, 24.3]  Nominal non-inferiority was demonstrated (NI margin –50 mL) | NA | NA | NA |
| **Trough** **IC**  Mean change from baseline, mL (SE)  *Treatment difference, mL* *[CI]* | NA | NA | NA | UMEC/VIL: 169 (17)  TIO/OLO: 122 (17)  *47*  *[95% CI = 14*, *81]*  Statistical significance favored UMEC/VIL |

aPrimary analysis was performed in the PP population; results were consistent in the FAS population; Data for each study are reported at the end of the study unless otherwise indicated (24 weeks in AERISTO; 12 weeks in Study A2349 and Study A2350; 8 weeks in Study GSK204990).

**Abbreviations:** AUC0–12, area under the plasma concentration–time curve from 0 to 12 hours; AUC12–24, area under the plasma concentration–time curve from 12 to 24 hours; CI, confidence interval; FAS, full analysis set; FEV1, forced expiratory volume in 1 second; FOR, formoterol fumarate; FVC, forced vital capacity; GLY, glycopyrrolate; IC, inspiratory capacity; IND, indacaterol; NA, not applicable; NI, non-inferiority; OLO, olodaterol; OR, odds ratio; PP, per protocol; SE, standard error; TD, treatment difference; TIO, tiotropium; UMEC, umeclidinium; VIL, vilanterol.

**Supplementary Table 3** Summary of secondary PRO results in head-to-head RCTs

| **Outcomes** | **AERISTO studya1** | **Study A23492** | **Study A23502** | **Study GSK2049903** |
| --- | --- | --- | --- | --- |
| **TDI focal score**  LSM (SE) change from baseline  *Treatment difference* *[CI]* | GLY/FOR: 1.23 (0.10)  UMEC/VIL: 1.60 (0.10)  *–0.37*  *[95% CI = –0.59*, –*0.14]*  (over 24 weeks)  Nominal NI of GLY/FOR was demonstrated  (NI margin – 1 unit) | NA | NA | NA |
| **CAT score**  LSM (SE) change from baseline  *Treatment difference* *[CI]* | GLY/FOR: –2.97 (0.21)  UMEC/VIL: –3.56 (0.22)  *0.59 [95% CI = 0.07*, *1.11]* (over 24 weeks)  Nominal NI of GLY/FOR was demonstrated  (NI margin 2 units) | NA | NA | UMEC/VIL: –1.38 (0.28)  TIO/OLO: –1.26 (0.28)  *–0.11 [95% CI = –0.68*, *0.45]*  (at Week 8)  No statistically significant difference between treatments |
| **E-RSCOPD**  Change from baseline, range | NA | NA | NA | UMEC/VIL: –1.79 to –1.61  TIO/OLO: –1.72 to –1.31  p = 0.031 at Week 5 (data ranging from weeks 1 to 8; all other timepoints not statistically significant) |

**a**Primary analysis was performed in the PP population; results were consistent in the FAS population.

**Abbreviations:** CAT, COPD Assessment Test; CI, confidence interval; COPD, chronic obstructive pulmonary disease; E-RSCOPD, Evaluating Respiratory Symptoms – COPD; FOR, formoterol fumarate; GLY, glycopyrrolate; LSM, least squares means; NA, not applicable; NI, non-inferiority; OLO, olodaterol; PRO, patient-reported outcome; RCT, randomized controlled trial; SE, standard error; TDI, Transition Dyspnea Index; TIO, tiotropium; UMEC, umeclidinium; VIL, vilanterol.

**Supplementary Table 4** Mean differences in the change from baseline in trough FEV1 at 24 weeks (REM) in the Siddiqui et al NMA8

|  | **Treatment B** | | | | | |
| --- | --- | --- | --- | --- | --- | --- |
| **Treatment A** | **Placebo** | **ACL 400 μg BID + FOR 12 μg BID** | **GLY 18 μg BID + FOR 9.6 μg BID** | **GLY 50 μg OD + IND 110 μg OD** | **TIO 2.5 μg x 2 OD + OLO 2.5 μg x 2 OD** | **UMEC 62.5 μg OD + VIL 25 μg OD** |
| **Placebo** | – | – | – | – | – | – |
| **ACL 400 μg BID**  **+ FOR 12 μg BID** | 143.1  (118.3, 167.3) | – | – | – | – | – |
| **GLY 18 μg BID**  **+ FOR 9.6 μg BID** | 143.4  (121.9, 166.1) | 0.4  (–25.6, 26.3) | – | – | – | – |
| **GLY 50 μg OD**  **+ IND 110 μg OD** | 167.1  (137.8, 205) | 23.5  (–5.9, 67.8) | 23.0  (–5.9, 66.8) | – | – | – |
| **TIO 2.5 μg x 2 OD**  **+ OLO 2.5 μg x 2 OD** | 157.6  (132.3, 183.7) | 14.0  (–12.4, 46.3) | 13.5  (–11.1, 43.3) | –8.7  (–46.7, 18.6) | – | – |
| **UMEC 62.5 μg OD**  **+ VIL 25 μg OD** | 167.9  (143.3, 191.9) | 24.5  (–3.1, 57.6) | 24.2  (–2.8, 54.6) | 0.1  (–33.6, 29.8) | 9.3  (–13.9, 36.8) | – |

Results are presented as mean difference (95% CrI). A positive treatment difference favors treatment A.

**Abbreviations:** BID, twice daily;CrI, credible interval; GLY, glycopyrrolate; FOR, formoterol fumarate; IND, indacaterol; OD, once daily; OLO, olodaterol; REM, random effects model; TIO, tiotropium; UMEC, umeclidinium; VIL, vilanterol.

**Supplementary Table 5** Mean differences in the change from baseline in peak FEV1 at 24 weeks (REM) in the Siddiqui et al NMA8

|  | **Treatment B** | | | | |
| --- | --- | --- | --- | --- | --- |
| **Treatment A** | **Placebo** | **ACL 400 μg BID + FOR 12 μg BID** | **GLY 18 μg BID + FOR 9.6 μg BID** | **GLY 50 μg OD + IND 110 μg OD** | **UMEC 62.5 μg OD + VIL 25 μg OD** |
| **Placebo** | – | – | – | – | – |
| **ACL 400 μg BID**  **+ FOR 12 μg BID** | 269.6  (196.1, 344.0) | – | – | – | – |
| **GLY 18 μg BID**  **+ FOR 9.6 μg BID** | 275.8  (252.7, 298.9) | 6.2  (–67.2, 79.2) | – | – | – |
| **GLY 50 μg OD**  **+ IND 110 μg OD** | 276.6  (181.7, 372.1) | 7.1  (–65.5, 81.7) | 0.7  (–93.1, 95.0) | – | – |
| **UMEC 62.5 μg OD**  **+ VIL 25 μg OD** | 251.2  (224.8, 276.7) | –18.9  (–92.1, 55.9) | –24.5  (–49.9, –0.6) | –25.6  (–121.3, 71.2) | – |

Results are presented as mean difference (95% CrI). A positive treatment difference favors treatment A.

**Abbreviations:** BID, twice daily; CrI, credible interval; GLY, glycopyrrolate; FOR, formoterol fumarate; IND, indacaterol; OD, once daily; OLO, olodaterol; REM, random effects model; TIO, tiotropium; UMEC, umeclidinium; VIL, vilanterol.

**Supplementary Table 6** Mean differences in the change from baseline in FEV1 AUC 0–4 at 24 weeks (REM) in the Siddiqui et al NMA8

|  | **Treatment B** | | | | |
| --- | --- | --- | --- | --- | --- |
| **Treatment A** | **Placebo** | **GLY 18 μg bid + FOR 9.6 μg bid** | **GLY 50 μg OD + IND 110 μg OD** | **TIO 2.5 μg x 2 OD + OLO 2.5 μg x 2 OD** | **UMEC 62.5 μg OD + VIL 25 μg OD** |
| **Placebo** | – | – | – | – | – |
| **GLY 18 μg BID**  **+ FOR 9.6 μg BID** | 289.4  (272.8, 306.3) | – | – | – | – |
| **GLY 50 μg OD**  **+ IND 110 μg OD** | 294.6  (260.6, 334.5) | 4.6  (–27.7, 45.1) | – | – | – |
| **TIO 2.5 μg x 2 OD**  **+ OLO 2.5 μg x 2 OD** | 293.1  (269.4, 318.3) | 3.4  (–20.1, 30.6) | –1.5  (–40.1, 32.7) | – | – |
| **UMEC 62.5 μg OD**  **+ VIL 25 μg OD** | 288.8  (257.8, 318.0) | –0.7  (–28.1, 25.7) | –5.2  (–50.8, 30.1) | –4.1  (–40.0, 26.7) | – |

Results are presented as mean difference (95% CrI). A positive treatment difference favors treatment A.

**Abbreviations:** AUC (0–4), area under the plasma concentration–time curve from 0 to 4 hours post-dose; BID, twice daily; CrI, credible interval; GLY, glycopyrrolate; FOR, formoterol fumarate; IND, indacaterol; OD, once daily; OLO, olodaterol; REM, random-effects model; TIO, tiotropium; UMEC, umeclidinium; VIL, vilanterol.

**Supplementary Table 7** NMA results for change from baseline in TDI focal scores at 24/26 weeks for each treatment comparison by study4-8

|  | Treatment B | | | |
| --- | --- | --- | --- | --- |
| Treatment A | ACL/FOR 400/12 µg BID | GLY/FOR 18/9.6 µg BID | GLY/IND 50/100 µg OD | TIO/OLO 5/5 µg OD |
| GLY/FOR 18/9.6 µg BID | ↔  Siddiqui 2019: –0.19  (–0.88, 0.13) | – | – | – |
| GLY/IND 50/110 µg OD | ↔  Aziz 2018: 0.08  (–0.30, 0.46)  Schlueter 2016 FEM: –0.06 (–0.54, 0.43)  Schlueter 2016 REM: –0.07 (–0.65, 0.48)  Sion 2017: –0.06  (–0.54, 0.41)  Siddiqui 2019: 0.00  (–0.44, 0.38) | ↔  Siddiqui 2019: 0.19  (–0.12, 0.81) | – | – |
| TIO/OLO 5/5 µg OD | ↔  Schlueter 2016 FEM: –0.19  (–0.69, 0.32)  Schlueter 2016 REM: –0.18  (–0.79, 0.41)  Siddiqui 2019: –0.03  (–0.59, 0.35)  Sion 2017: –0.18  (–0.68, 0.32) | ↔  Siddiqui 2019: 0.13  (–0.20, 0.76) | ↔  Schlueter 2016 FEM: –0.13 (–0.48, 0.23)  Schlueter 2016 REM: –0.12 (–0.60, 0.40)  Siddiqui 2019: –0.03  (–0.5, 0.33)  Sion 2017: –0.12  (–0.47, 0.23) | – |
| UMEC/VIL 62.5/25 µg OD | ↔  Aziz 2018: –0.33  (–0.75, 0.10)  Schlueter 2016 FEM: –0.42 (–0.94, 0.11)  Schlueter 2016 REM: –0.41 (–0.98, 0.15)  Siddiqui 2019: –0.06  (–0.57, 0.24)  Sion 2017: –0.36  (–0.88, 0.16) | ↔  Siddiqui 2019: 0.12  (–0.16, 0.53) | ↔  Aziz 2018: –0.41  (–0.85, 0.04)  Huisman 2015:  –0.30 (–0.73, 0.13)  Schlueter 2016 FEM: –0.36 (–0.75, 0.04)  Schlueter 2016 REM: –0.34 (–0.83, 0.15)  Siddiqui 2019: –0.06  (–0.51, 0.22)  Sion 2017: –0.30  (–0.71, 0.11) | ↔  Schlueter 2016 FEM: –0.23  (–0.66, 0.19)  Schlueter 2016 REM: –0.23  (–0.75, 0.29)  Siddiqui 2019: –0.01  (–0.46, 0.34)  Sion 2017: –0.18  (–0.61, 0.26) |

Results are presented as mean difference (Aziz et al reported 95% CI,other studies reported 95% CrI). Siddiqui 2019 reports data for GLY/FOR 18/9.6 µg vs other LAMA/LABAs FDCs. For completeness, comparisons between all LAMA/LABA FDCs in the NMA described in Siddiqui 2019 are provided in Supplementary Table 11.

↔Statistically non-significant (dark gray shading).

**Abbreviations:** ACL, aclidinium; BID, twice daily; CI, confidence interval; CrI, credible interval; FEM, fixed-effects model; FOR, formoterol fumarate; GLY, glycopyrrolate; IND, indacaterol; NMA, network meta-analysis; OD, once daily; OLO, olodaterol; REM, random-effects model; TDI, Transition Dyspnea Index; TIO, tiotropium; UMEC, umeclidinium; VIL, vilanterol.

**Supplementary Table 8** NMA results for change from baseline in SGRQ total scores at 24/26 weeks for each treatment comparison by study4-8

|  | Treatment B | | | |
| --- | --- | --- | --- | --- |
| Treatment A | ACL/FOR 400/12 µg BID | GLY/FOR 18/9.6 µg BID | GLY/IND 50/110 µg OD | TIO/OLO 5/5 µg OD |
| GLY/FOR 18/9.6 µg BID | ↔  Siddiqui 2019: –0.05  (–1.72, 1.02) | – | – | – |
| GLY/IND 50/110 µg OD | ↔  Aziz 2018: 0.12  (–2.85, 3.10)  Schlueter 2016 FEM: –0.82  (–2.83, 1.21) Schlueter 2016 REM: –0.98 (–4.04, 1.85)  Siddiqui 2019: –0.29  (–2.7, 0.63)  Sion 2017: –1.49  (–3.38, 0.40) | ↔  Siddiqui 2019: –0.21  (–2.03, 0.7) | – | – |
| TIO/OLO 5/5 µg OD | ↔  Aziz 2018: –0.39  (–5.20, 4.42)  Schlueter 2016 FEM: –0.57 (–2.66, 1.53) Schlueter 2016 REM: –0.74 (–4.31, 2.54)  Siddiqui 2019: –0.15  (–2.06, 0.89)  Sion 2017: –0.96  (–2.91, 0.99) | ↔  Siddiqui 2019: –0.07  (–1.43, 0.96) | ↔  Aziz 2018: –0.51  (–5.05, 4.02) Schlueter 2016 FEM: 0.25 (–1.31, 1.81) Schlueter 2016 REM: 0.22 (–2.78, 3.23)  Siddiqui 2019: 0.10  (–0.92, 1.8)  Sion 2017: 0.53  (–0.95, 2.00) | – |
| UMEC/VIL 62.5/25 µg OD | ↔  Aziz 2018: –0.27  (–3.27, 2.72)  Schlueter 2016 FEM: –1.11 (–3.13, 0.92) Schlueter 2016 REM: –1.16 (–3.98, 1.60)  Siddiqui 2019: –0.12  (–2.04, 0.89)  Sion 2017: –1.31  (–3.24, 0.60) | ↔  Siddiqui 2019: –0.06  (–1.35, 0.94) | ↔  Aziz 2018: –0.40  (–2.78, 1.98)  Huisman 2015: 0.18 (–1.28, 1.63)  Schlueter 2016 FEM: –0.30 (–1.82, 1.23) Schlueter 2016 REM: –0.18 (–2.48, 2.29)  Siddiqui 2019: 0.12  (–0.86, 1.74)  Sion 2017: 0.18  (–1.28, 1.63) | ↔  Aziz 2018: 0.12  (–4.43, 4.66) Schlueter 2016 FEM: –0.54 (–2.06, 0.97) Schlueter 2016 REM: –0.41 (–3.11, 2.52)  Siddiqui 2019: 0.01  (–1.17, 1.17)  Sion 2017: –0.35  (–1.87, 1.17) |

Results are presented as mean treatment difference in change from baseline (Aziz et al reported 95% CI, other studies reported 95% CrI). Siddiqui 2019 reports data for GLY/FOR 18/9.6 µg vs other LAMA/LABAs FDCs. For completeness, comparisons between all LAMA/LABA FDCs in the NMA described in Siddiqui 2019 are provided in Supplementary Table 12.

↔Statistically non-significant (dark gray shading).

**Abbreviations:** ACL, aclidinium; BID, twice daily; CI, confidence interval; CrI, credible interval; FEM, fixed-effects model; FOR, formoterol fumarate; GLY, glycopyrrolate; IND, indacaterol; NMA, network meta-analysis; OD, once daily; OLO, olodaterol; REM, random-effects model; SGRQ, St. George’s Respiratory Questionnaire; TIO, tiotropium; UMEC, umeclidinium; VIL, vilanterol.

**Supplementary Table 9** NMA results for TDI responders at 24/26 weeks for each treatment comparison by study4,6,8

|  | Treatment B | | | |
| --- | --- | --- | --- | --- |
| Treatment A | ACL/FOR 400/12 µg BID | GLY/FOR 18/9.6 µg BID | GLY/IND 50/110 µg OD | TIO/OLO 5/5 µg OD |
| GLY/FOR 18/9.6 µg BID | ↔  Siddiqui 2019: 0.98  (0.73, 1.1) | – | – | – |
| GLY/IND 50/110 µg OD | ↔  Aziz 2018: 1.06  (0.78, 1.45)  Schlueter 2016 FEM: 0.86 (0.61, 1.22) Schlueter 2016 REM: 0.85 (0.47, 1.55)  Siddiqui 2019: 1.00  (0.82, 1.18) | ↔  Siddiqui 2019: 1.02  (0.90, 1.33) | – | – |
| TIO/OLO 5/5 µg OD | ↔  Schlueter 2016 FEM: 0.79 (0.57, 1.09) Schlueter 2016 REM: 0.81 (0.43, 1.57) | – | ↔  Schlueter 2016 FEM: 0.92 (0.67, 1.24) Schlueter 2016 REM: 0.95 (0.50, 1.88) | – |
| UMEC/VIL 62.5/25 µg OD | ↔  Aziz 2018: 0.79  (0.58, 1.09)  Schlueter 2016 FEM: 0.79 (0.58, 1.08) Schlueter 2016 REM: 0.80 (0.49, 1.34)  Siddiqui 2019: 0.99  (0.80, 1.14) | ↔  Siddiqui 2019: 1.01 (0.89, 1.25) | ↔  Aziz 2018: 0.75  (0.54, 1.03) Schlueter 2016 FEM: 0.92 (0.67, 1.26) Schlueter 2016 REM: 0.94 (0.55, 1.63)  Siddiqui 2019: 1.00 (0.82, 1.16) | ↔  Schlueter 2016 FEM: 1.01  (0.77, 1.33) Schlueter 2016 REM: 1.0  (0.55, 1.75) |

Results are presented as odds ratios (Aziz et al reported 95% CI,other studies reported 95% CrI). Siddiqui 2019 reports data for GLY/FOR 18/9.6 µg vs other LAMA/LABAs FDCs. For completeness, comparisons between all LAMA/LABA FDCs in the NMA described in Siddiqui 2019 are provided in Supplementary Table 13.

↔Statistically non-significant (dark gray shading).

**Abbreviations:** ACL, aclidinium; BID, twice daily; CI, confidence interval; CrI, credible interval; FEM, fixed-effects model; FOR, formoterol fumarate; GLY, glycopyrrolate; IND, indacaterol; NMA, network meta-analysis; OD, once daily; OLO, olodaterol; REM, random-effects model; TDI, Transition Dyspnea Index; TIO, tiotropium; UMEC, umeclidinium; VIL, vilanterol.

**Supplementary Table 10** NMA results for SGRQ responders at 24/26 weeks for each treatment comparison by study4,6,8

|  | Treatment B | | | |
| --- | --- | --- | --- | --- |
| Treatment A | ACL/FOR 400/12 µg BID | GLY/FOR 18/9.6 µg BID | GLY/IND 50/110 µg OD | TIO/OLO 5/5 µg OD |
| GLY/FOR 18/9.6 µg BID | ↔  Siddiqui 2019: 0.99  (0.82, 1.15) | – | – | – |
| GLY/IND 50/110 µg OD | ↔  Aziz 2018: 0.98 (0.70, 1.35)  Schlueter 2016 FEM: 1.08 (0.80, 1.47)  Schlueter 2016 REM: 1.08 (0.62, 1.89)  Siddiqui 2019: 1.00  (0.85, 1.21) | ↔  Siddiqui 2019: 1.01  (0.88, 1.25) | – | – |
| TIO/OLO 5/5 µg OD | ↔  Aziz 2018: 1.09 (0.68, 1.73)  Schlueter 2016 FEM: 1.22 (0.88, 1.70)  Schlueter 2016 REM: 1.25 (0.63, 2.51)  Siddiqui 2019: 1.03  (0.90, 1.33) | ↔  Siddiqui 2019: 1.04  (0.93, 1.39) | ↔  Aziz 2018: 1.11  (0.73, 1.68)  Schlueter 2016 FEM: 1.13 (0.89, 1.44)  Schlueter 2016 REM: 1.16 (0.64, 2.15)  Siddiqui 2019: 1.02  (0.89, 1.31) | – |
| UMEC/VIL 62.5/25 µg OD | ↔  Aziz 2018: 0.88 (0.62, 1.25)  Schlueter 2016 FEM: 1.07 (0.80, 1.45)  Schlueter 2016 REM: 1.07 (0.64, 1.78)  Siddiqui 2019: 1.00 (0.84, 1.17) | ↔  Siddiqui 2019: 1.00  (0.88, 1.20) | ↔  Aziz 2018: 0.90 (0.70, 1.17)  Schlueter 2016 FEM: 0.99 (0.80, 1.24)  Schlueter 2016 REM: 0.99 (0.64, 1.53)  Siddiqui 2019: 0.99 (0.83, 1.16) | ↔  Aziz 2018: 0.81 (0.54, 1.23)  Schlueter 2016 FEM: 0.88 (0.69, 1.12)  Schlueter 2016 REM: 0.86 (0.48, 1.50)  Siddiqui 2019: 0.97 (0.75, 1.09) |

Results are presented as mean difference (Aziz et al reported 95% CI, other studies reported 95% CrI). A negative treatment difference favors treatment A. Siddiqui 2019 reports data for GLY/FOR 18/9.6 µg vs other LAMA/LABAs FDCs. For completeness, comparisons between all LAMA/LABA FDCs in the NMA described in Siddiqui 2019 are provided in Supplementary Table 14.

↔Statistically non-significant (dark gray shading).

**Abbreviations:** ACL, aclidinium; BID, twice daily; CI, confidence interval; CrI, credible interval; FEM, fixed-effects model; FOR, formoterol fumarate; GLY, glycopyrrolate; IND, indacaterol; NMA, network meta-analysis; OD, once daily; OLO, olodaterol; REM, random-effects model; SGRQ, St George’s Respiratory Questionnaire; TIO, tiotropium; UMEC, umeclidinium; VIL, vilanterol.

**Supplementary Table 11** Mean differences inTDI focal score at 24 weeks (REM) in the Siddiqui et al NMA8

|  |  | **Treatment B** | | | | |
| --- | --- | --- | --- | --- | --- | --- |
| **Treatment A** | **Placebo** | **ACL 400 μg BID + FOR 12 μg BID** | **GLY 18 μg BID + FOR 9.6 μg BID** | **GLY 50 μg OD + IND 110 μg OD** | **TIO 2.5 μg x 2 OD + OLO 2.5 μg x 2 OD** | **UMEC 62.5 μg OD + VIL 25 μg OD** |
| **Placebo** | – | – | – | – | – | – |
| **ACL 400 μg BID**  **+ FOR 12 μg BID** | 1.17  (0.81, 1.59) | – | – | – | – | – |
| **GLY 18 μg BID**  **+ FOR 9.6 μg BID** | 0.93  (0.48, 1.35) | –0.19  (–0.88, 0.13) | – | – | – | – |
| **GLY 50 μg OD**  **+ IND 110 μg OD** | 1.16  (0.80, 1.57) | 0.00  (–0.44 ,0.38) | 0.19  (–0.12, 0.81) | – | – | – |
| **TIO 2.5 μg x 2 OD**  **+ OLO 2.5 μg x 2 OD** | 1.10  (0.67, 1.57) | –0.03  (–0.59, 0.35) | 0.13  (–0.20, 0.76) | –0.03  (–0.50, 0.33) | – | – |
| **UMEC 62.5 μg OD**  **+ VIL 25 μg OD** | 1.08  (0.74, 1.41) | –0.06  (–0.57, 0.24) | 0.12  (–0.16, 0.53) | –0.06  (–0.51, 0.22) | –0.01  (–0.46, 0.34) | – |

Results are presented as mean difference (95% CrI). A positive treatment difference favors treatment A.

**Abbreviations:** BID, twice daily; CrI, credible interval; GLY, glycopyrrolate; FOR, formoterol fumarate; IND, indacaterol; OD, once daily; OLO, olodaterol; REM, random-effects model; TDI, Transition Dyspnea Index; TIO, tiotropium; UMEC, umeclidinium; VIL, vilanterol.

**Supplementary Table 12** Mean differences in the change from baseline in SGRQ total score at 24 weeks (REM) in the Siddiqui et al NMA8

|  | **Treatment B** | | | | |
| --- | --- | --- | --- | --- | --- |
| **Treatment A** | **Placebo** | **ACL 400 μg BID + FOR 12 μg BID** | **GLY 18 μg BID + FOR 9.6 μg BID** | **GLY 50 μg OD + IND 110 μg OD** | **UMEC 62.5 μg OD + VIL 25 μg OD** |
| **Placebo** | – | – | – | – | – |
| **ACL 400 μg BID**  **+ FOR 12 μg BID** | –2.68  (–3.95, –1.18) | – | – | – | – |
| **GLY 18 μg BID**  **+ FOR 9.6 μg BID** | –2.81  (–3.92, –1.72) | –0.05  (–1.72, 1.02) | – | – | – |
| **GLY 50 μg OD**  **+ IND 110 μg OD** | –3.12  (–4.86, –1.85) | –0.29  (–2.70, 0.63) | –0.21  (–2.03, 0.70) | – | – |
| **TIO 2.5 μg x 2 OD**  **+ OLO 2.5 μg x 2 OD** | –2.93  (–4.31, –1.71) | –0.15  (–2.06, 0.89) | –0.07  (–1.43, 0.96) | 0.10  (–0.92, 1.80) | – |
| **UMEC 62.5 μg OD**  **+ VIL 25 μg OD** | –2.92  (–4.19, –1.76) | –0.12  (–2.04, 0.89) | –0.06  (–1.35, 0.94) | 0.12  (–0.86, 1.74) | – |

Results are presented as mean difference (95% CrI). A negative treatment difference favors treatment A.

**Abbreviations:** BID, twice daily; CrI, credible interval; GLY, glycopyrrolate; FOR, formoterol fumarate; IND, indacaterol; OD, once daily; OLO, olodaterol; REM, random-effects model; SGRQ, St George’s Respiratory Questionnaire; TIO, tiotropium; UMEC, umeclidinium; VIL, vilanterol.

**Supplementary Table 13** Odds ratios of TDI responders at 24 weeks (REM) in the Siddiqui et al NMA8

|  | **Treatment B** | | | | |
| --- | --- | --- | --- | --- | --- |
| **Treatment A** | **Placebo** | **ACL 400 μg BID + FOR 12 μg BID** | **GLY 18 μg BID + FOR 9.6 μg BID** | **GLY 50 μg OD + IND 110 μg OD** | **UMEC 62.5 μg OD + VIL 25 μg OD** |
| **Placebo** | – | – | – | – | – |
| **ACL 400 μg BID**  **+ FOR 12 μg BID** | 1.95  (1.57, 2.44) | – | – | – | – |
| **GLY 18 μg BID**  **+ FOR 9.6 μg BID** | 1.87  (1.47, 2.32) | 0.98  (0.73, 1.10) | – | – | – |
| **GLY 50 μg OD**  **+ IND 110 μg OD** | 1.94  (1.54, 2.44) | 1.00  (0.82, 1.18) | 1.02  (0.90, 1.33) | – | – |
| **UMEC 62.5 μg OD**  **+ VIL 25 μg OD** | 1.92  (1.55, 2.36) | 0.99  (0.80, 1.14) | 1.01  (0.89, 1.25) | 1.00  (0.82, 1.16) | – |

Results are presented as odds ratio (95% CrI). An odds ratio >1.00 favors treatment A.

**Abbreviations:** BID, twice daily; CrI, credible interval; GLY, glycopyrrolate; FOR, formoterol fumarate; IND, indacaterol; od, once daily; OLO, olodaterol; REM, random effects model; TDI, Transition Dyspnea Index; TIO, tiotropium; UMEC, umeclidinium; VIL, vilanterol.

**Supplementary Table 14** Odds ratios of SGRQ responders at 24 weeks (REM) in the Siddiqui et al NMA8

|  | **Treatment B** | | | | | |
| --- | --- | --- | --- | --- | --- | --- |
| **Treatment A** | **Placebo** | **ACL 400 μg BID + FOR 12 μg BID** | **GLY 18 μg BID + FOR 9.6 μg BID** | **GLY 50 μg OD + IND 110 μg OD** | **TIO 2.5 μg x 2 OD + OLO 2.5 μg x 2 OD** | **UMEC 62.5 μg OD + VIL 25 μg OD** |
| **Placebo** | – | – | – | – | – | – |
| **ACL 400 μg BID**  **+ FOR 12 μg BID** | 1.59  (1.33, 1.90) | – | – | – | – | – |
| **GLY 18 μg BID**  **+ FOR 9.6 μg BID** | 1.56  (1.32, 1.85) | 0.99  (0.82, 1.15) | – | – | – | – |
| **GLY 50 μg OD**  **+ IND 110 μg OD** | 1.60  (1.33, 1.94) | 1.00  (0.85, 1.21) | 1.01  (0.88, 1.25) | – | – | – |
| **TIO 2.5 μg x 2 OD**  **+ OLO 2.5 μg x 2 OD** | 1.66  (1.37, 2.11) | 1.03  (0.90, 1.33) | 1.04  (0.93, 1.39) | 1.02  (0.89, 1.31) | – | – |
| **UMEC 62.5 μg OD**  **+ VIL 25 μg OD** | 1.58  (1.33, 1.88) | 1.00  (0.84, 1.17) | 1.00  (0.88, 1.20) | 0.99  (0.83, 1.16) | 0.97  (0.75, 1.09) | – |

Results are presented as odds ratio (95% CrI) An odds ratio >1.00 favors treatment A.

**Abbreviations:** BID, twice daily; CrI, credible interval; GLY, glycopyrrolate; FOR, formoterol fumarate; IND, indacaterol; OD, once daily; OLO, olodaterol; REM, random effects model; SGRQ, St George’s Respiratory Questionnaire; TIO, tiotropium; UMEC, umeclidinium; VIL, vilanterol.

**Supplementary Table 15** NMA results for the annualized rate of moderate to severe exacerbations for each treatment comparison by study6, 8

|  | Treatment B | | |
| --- | --- | --- | --- |
| Treatment A | GLY/FOR 18/9.6 µg BID | GLY/IND 50/110 µg OD | TIO/OLO 5/5 µg OD |
| GLY/IND 50/110 µg OD | ↔  Siddiqui 2019: 0.99  (0.78, 1.14) | – | – |
| TIO/OLO 5/5 µg OD | – | ↔  Schlueter 2016 FEM: 0.95 (0.66, 1.37)  Schlueter 2016 REM: 0.96 (0.56, 1.62) | – |
| UMEC/VIL 62.5/25 µg OD | ↔  Siddiqui 2019: 1.00  (0.82, 1.19) | ↔  Schlueter 2016 FEM: 1.65 (0.91, 3.08)  Schlueter 2016 REM: 1.65 (0.79, 3.39)  Siddiqui 2019: 1.01  (0.84, 1.32) | ↔  Schlueter 2016 FEM: 1.74 (1.00, 3.08)  Schlueter 2016 REM: 1.73 (0.90, 3.32) |

Results are presented as relative risk (95% CrI). Siddiqui 2019 reports data for GLY/FOR 18/9.6 µg vs other LAMA/LABAs FDCs. For completeness, comparisons between all LAMA/LABA FDCs in the NMA described in Siddiqui 2019 are provided in Supplementary Table 16.

↔Statistically non-significant (dark gray shading).

**Abbreviations:** CrI, credible interval; FEM, fixed-effect model; GLY, glycopyrrolate; IND, indacaterol; NMA, network meta-analysis; OD, once daily; OLO, olodaterol; REM, random-effects model; TIO, tiotropium; UMEC, umeclidinium; VIL, vilanterol.

**Supplementary Table 16** Rate ratios of the annualized rate of moderate to severe exacerbations (REM) in the Siddiqui et al NMA8

|  | **Treatment B** | | | |
| --- | --- | --- | --- | --- |
| **Treatment A** | **Placebo** | **GLY 18 μg BID + FOR 9.6 μg BID** | **GLY 50 μg OD + IND 110 μg OD** | **UMEC 62.5 μg OD + VIL 25 μg OD** |
| **Placebo** | – | – | – | – |
| **GLY 18 μg BID**  **+ FOR 9.6 μg BID** | 0.75  (0.62, 0.91) | – | – | – |
| **GLY 50 μg OD**  **+ IND 110 μg OD** | 0.73  (0.58, 0.91) | 0.99  (0.78, 1.14) | – | – |
| **UMEC 62.5 μg OD**  **+ VIL 25 μg OD** | 0.75  (0.59, 0.96) | 1.00  (0.82, 1.19) | 1.01  (0.84, 1.32) | – |

Results are presented as rate ratio (95% CrI). A rate ratio <1.00 favors treatment A.

**Abbreviations:** BID, twice daily; CrI, credible interval; GLY, glycopyrrolate; FOR, formoterol fumarate; IND, indacaterol; OD, once daily; OLO, olodaterol; REM, random effects model; TIO, tiotropium; UMEC, umeclidinium; VIL, vilanterol.

**SUPPLEMENTARY REFERENCES**

1. Maltais F, Ferguson GT, Feldman GJ, et al. A randomized, double-blind, double-dummy study of glycopyrrolate/formoterol fumarate metered dose inhaler relative to umeclidinium/vilanterol dry powder inhaler in COPD. *Adv Ther.* 2019;36(9):2434-2449.

2. Kerwin E, Ferguson GT, Sanjar S, et al. Dual bronchodilation with indacaterol maleate/glycopyrronium bromide compared with umeclidinium bromide/vilanterol in patients with moderate-to-severe COPD: results from two randomized, controlled, cross-over studies. *Lung.* 2017;195(6):739-747.

3. Feldman GJ, Sousa AR, Lipson DA, et al. Comparative efficacy of once-daily umeclidinium/vilanterol and tiotropium/olodaterol therapy in symptomatic chronic obstructive pulmonary disease: a randomized study. *Adv Ther.* 2017;34(11):2518-2533.

4. Aziz MIA, Tan LE, Wu DB, et al Comparative efficacy of inhaled medications (ICS/LABA, LAMA, LAMA/LABA and SAMA) for COPD: a systematic review and network meta-analysis. *Int J Chron Obstruct Pulmon Dis.* 2018;13:3203-3231.

5. Sion KYJ, Huisman EL, Punekar YS, Naya I, Ismaila AS. A network meta-analysis of long-acting muscarinic antagonist (LAMA) and long-acting β2-agonist (LABA) combinations in COPD. *Pulm Ther.* 2017;3(2):297-316.

6. Schlueter M, Gonzalez-Rojas N, Baldwin M, Groenke L, Voss F, Reason T. Comparative efficacy of fixed-dose combinations of long-acting muscarinic antagonists and long-acting β2-agonists: a systematic review and network meta-analysis. *Ther Adv Respir Dis.* 2016;10(2):89-104.

7. Huisman EL, Cockle SM, Ismaila AS, Karabis A, Punekar YS. Comparative efficacy of combination bronchodilator therapies in COPD: a network meta-analysis. *Int J Chron Obstruct Pulmon Dis.* 2015;10:1863-1881.

8. Siddiqui M, Shukla P, Jenkins M, et al. Systematic review and network meta-analysis of the efficacy and safety of glycopyrrolate/formoterol fumarate metered dose inhaler in comparison with other long-acting muscarinic antagonist/long-acting β2-agonist fixed-dose combinations in COPD. *Ther Adv Respir Dis.* 2019;13:1753466619894502.
